# Supplementary material for: A new reference-quality precipitation gauge wind shield
Source: Copernicus journal article supplement (doi:10.5194/amt-2023-2), 2023-04-25
Supplement: Supplementary file [file amt-2023-2-AC2-supplement.pdf]

## Response to Referee #2:

In this manuscript Kochendorfer et al. present a new type of precipitation gauge wind shield to mitigate undercatch of solid precipitation in windy conditions. The study describes the Low Porosity Double Fence (LPDF) which is smaller, more durable and easier to install and maintain in remote locations than the current reference-quality wind shields (such as the DFIR and the SDFIR) ((small) Double Fence Intercomparison Reference). I believe the work therefore presents a substantial new method and would recommend the publication of this manuscript after some minor revisions.

- Thank you.

Below some more detailed remarks:

Page 1, lines 25-25: “This new wind shield is much smaller and easier to install and maintain” – is it also cheaper? In many organisations (and increasingly so) budget constraints can be an important factor.

- It is true that cost is important; the cost of replacement and maintenance within the USCRN was the primary motivator for this work. In response to Reviewer #1, we will estimate the cost difference between the two shields, including the amount of labor required for installation, and we will add this to the manuscript.

Page 2, line 64: perhaps the authors could briefly define/explain the meaning of porosity in the context of windshields, and how it is estimated/calculated.

- Porosity is defined as the amount of the surface area that is open, allowing air to pass through, divided by the total amount of surface area. It was calculated as the amount of fence panel surface area that was open (i.e. not blocked by slats and wire), divided by the total surface area of the fence panel. We will include this in the manuscript.

Page 3, line 95-97: “the design of the LPDF also allows it to be raised much more easily than the DFIR or SDFIR” – here and in general, it would be nice to include a technical drawing of the LPDF. This would also improve reproducibility of the work.

- A technical drawing will be added to the manuscript.

Page 4, site selection. Regarding the site selection procedure, how representative are the chosen sites for USCRN sites overall? I’m also missing a map with the site locations as well as wind statistics for the Marshall site in Figure 1. (consider having a,b and c panels in Figures 1 and 2 to be referring to the same sites).

- We will add a map showing the sites of the locations.

As described in the manuscript, we chose the Boulder and Chatham sites from among all of the USCRN sites because they experienced high winds during snow events. The goal was to test the LPDF at the most challenging sites in the USCRN, not the most representative. So, the sites are representative of the worst-case for the measurement of solid precipitation. Any differences found between the LPDF- and the SDFIR- shielded measurements at the chosen sites would presumably be much larger than found at representative sites. This will be explained in the manuscript.

Due to the design philosophy of the USCRN, even sites in regions that experience little or no solid precipitation are shielded by SDFIRs. Testing the LPDF at such a site, for example, would teach us very little about the performance of the LPDF, because undercatch due to wind is much larger for solid precipitation than for liquid precipitation.

Page 5, lines 142-155: In this paragraph the authors claim hourly and daily precipitation measurements are subject to random errors and therefore not appropriate for intercomparison studies. This seems in contradiction with paragraph 3.4 (and figures 10 and 11) where hourly catch efficiency measurements are shown. It also seems at odds with the introduction (page 2, lines 33-35) where several short term consequences of precipitation are mentioned. For avalanche predictions for example, accurate precipitation estimates at the precipitation event level would be more useful. Have the authors considered comparisons at the (long) event scale for example?

- The manuscript does not state that hourly measurements are inappropriate for intercomparison studies. Lines 142 - 155 describes the challenges and shortcomings of using hourly measurements for this type of work, but hourly measurements have been and will continue to be used for intercomparison studies. Hourly measurements are useful, but they have limitations, and seasonal accumulations have some advantages for comparing precipitation measurement systems and identifying precipitation biases.

Figures 10 and 11 actually serve as good examples of the uncertainties and shortcomings of using hourly measurements; the significant uncertainty shown in those hourly CE measurements demonstrates the issue discussed in In 142 - 155, rather than contradicts it.

The WMO Solid Precipitation Intercomparison (Nitu et al., 2019) included an evaluation of the use of precipitation events versus 30-min, 60-min, and daily precipitation measurements. The conclusion was that due to the need to create a somewhat arbitrary definition of 'event', the wide range of event sizes (in mm) and lengths (in time), and the limited number of events in a given time period, hourly data was preferable for the calculation and evaluation of catch efficiencies. In more recent publications, the use of time series of seasonal (or shorter) accumulations has become more widely accepted for the comparison of different precipitation measurement configurations and the evaluation of transfer functions (e.g. Smith et al., 2020, Buisan et al., 2020, Pierre et al. 2019).

Page 5, line 152: why is a comparison of long-term accumulation more demanding? Surely on the contrary, it has the effect of averaging out small errors?

- Small errors are indeed averaged out within long-term accumulations, and that is actually why long-term accumulations are in some ways a better test of shielding. Small biases become more pronounced and easier to detect within long-term accumulations. Precipitation shielding differences often exhibit themselves more readily as biases, rather than small errors, as all solid precipitation measurement comparisons (including those of identical configurations) are subject to significant uncertainty over shorter time periods (and smaller amounts of precipitation). Additionally, when calculating catch efficiency to look at the sensitivity of the measurements to wind speed, many representative measurements must be excluded, so the measurements used to create long-term accumulations are arguably more representative of operational networks. This has been described in detail for tipping bucket gauge evaluations, much of which is also true (albeit to a lesser extent) for weighing gauges (Kochendorfer et al., 2020).

The authors do agree however, that solid precipitation data is used for different applications, and precipitation measurement systems should be evaluated with this in mind. This is why both hourly accumulations and time series over longer accumulation times were both included in the present evaluation.

Page 6, line 167: “serviced with oil” might be a confusing term here. Perhaps a brief description in the methods section on the anti-freeze (if used) and oil layer - and why these are used, could be helpful to readers unfamiliar with weighing gauges.

- Thank you. We will clarify what is meant by “serviced with oil.”

Page 6, line 178: could the authors comment on how prevalent situations were in which the SDFIR accumulated more than 0.25 mm in an hour and LPDF less than 0.25 mm, and vice versa? Was this negligible?

- Unfortunately, such situations were not negligible (Table R1). Solid precipitation rates are often quite low, and many measurements occur at or near 0.25 mm hr<sup>-1</sup> (e.g. Kochendorfer et al., 2017, Fig. 3). Additionally, at or near this rate of 0.25 mm hr<sup>-1</sup>, the hourly measurements are subject to a significant amount of error/noise, because they are close to the measurement resolution of the gauge (e.g. Kochendorfer et al., 2017, and Kochendorfer et al., 2018). Because of this, we caution against reading too much into the results shown in Table R1. In addition, periods when one of the gauges was not working also contributed to the number of hourly measurements above the 0.25 mm threshold for each measurement configuration.

| Site     | $P_{Hr\_SDFIR} > 0.25 \text{ m}$ | $P_{Hr\_LPDF} > 0.25 \text{ m}$ | $P_{Hr\_Both} > 0.25 \text{ m}$ |
|----------|----------------------------------|---------------------------------|---------------------------------|
| Boulder  | 1115                             | 1032                            | 957                             |
| Chatham  | 398                              | 450                             | 354                             |
| Marshall | 298                              | 336                             | 284                             |

- Table R1 shows the site name, the number of hours with solid precipitation ( $T_{air} < -2 \text{ deg C}$ ) greater than 0.25 mm as measured by the SDFIR ( $P_{Hr\_SDFIR} > 0.25 \text{ m}$ ), by the LPDF ( $P_{Hr\_LPDF} > 0.25 \text{ m}$ ), and both gauges ( $P_{Hr\_Both} > 0.25 \text{ m}$ )

Page 7, line 197-200: again, what percentage of total measurements did this represent? Based on Fig 2, windspeeds above 9 m/s must have been a very rare phenomenon.

- It is true that hourly precipitation measurements with winds above  $9 \text{ m s}^{-1}$  were rare. However, Figure 2 is not a good indicator of the number of hours with  $U_{gh} > 9 \text{ m s}^{-1}$ , because it is based on daily data, rather than hourly data.

At Chatham, none of the solid or mixed precipitation hours were above the  $9 \text{ m s}^{-1}$  threshold. At Marshall, none of the solid precipitation hours were above the  $9 \text{ m s}^{-1}$  threshold, and 1.9% of the hourly mixed precipitation values were above the threshold. At the Boulder site, 2.2% of the solid precipitation values and none of the mixed values were above the blowing snow  $U_{gh}$  threshold.

Page 7-8 paragraph 3.2 and Figure 7: Single events seem to have most affected the difference between the accumulations of solid and mixed precipitation in Chatham. Have the authors looked into this or could they comment on this?

- We are not sure what the cause of this was, but it was not considered significant enough to affect the broad conclusions of the manuscript.

Minor

Page 3, line 1: In addition .. additional (repetition).

- Thank you. We will change line 82 to read, "In addition to decreasing the size of the wind shield, goals for the new shield included..."

Page 4, line 102: "conterminous" not sure what conterminous is supposed to mean in this context – or why it is important that USCRN sites are conterminous.

- We will delete the word, "conterminous."

Page 4, lines 105-108: " Wind speeds during the snow days .. USCRN sites (e.g. Fig. 2)." These sentences seem unnecessarily repetitive, please consider revising them.

- “Wind speeds during the snow days were also evaluated; the mean wind speed for the snow days was calculated” will be deleted.

Page 7, lines 216-217: consider adding causal link between these two sentences for better comprehension, i.e. “precipitation shown in Fig.4. This is because the phase discriminated measurements” etc.

- These lines will be rewritten as follows: “The total of the phase-discriminated accumulations (Fig. 5) was less than the total of all the precipitation shown in Fig. 4. This is because the phase-discriminated measurements were subject to the additional requirement that the LPDF- and the SDFIR- gauges were recording simultaneously...”

Page 8, lines 231-232: consider reporting SDFIR and LPDF values in the same order throughout the manuscript.

- Thank you for this! We will report SDFIR and LPDF values in the same order throughout the manuscript.

## References

Buisán, ST, Smith, CD, Ross, A, et al. The potential for uncertainty in Numerical Weather Prediction model verification when using solid precipitation observations. *Atmos Sci Lett.* 2020; 21: 21:e976. <https://doi.org/10.1002/asl.976>

Kochendorfer, J., and Coauthors, 2020: Undercatch Adjustments for Tipping-Bucket Gauge Measurements of Solid Precipitation. *J. Hydrometeor.*, 21, 1193–1205, <https://doi.org/10.1175/JHM-D-19-0256.1>.

Kochendorfer, J., Nitu, R., Wolff, M., Mekis, E., Rasmussen, R., Baker, B., Earle, M. E., Reverdin, A., Wong, K., Smith, C. D., Yang, D., Roulet, Y.-A., Meyers, T., Buisan, S., Isaksen, K., Brækkan, R., Landolt, S., and Jachcik, A.: Testing and development of transfer functions for weighing precipitation gauges in WMO-SPICE, *Hydrol. Earth Syst. Sci.*, 22, 1437–1452, <https://doi.org/10.5194/hess-22-1437-2018>, 2018.

Kochendorfer, J., Rasmussen, R., Wolff, M., Baker, B., Hall, M. E., Meyers, T., Landolt, S., Jachcik, A., Isaksen, K., Brækkan, R., and Leeper, R.: The quantification and correction of wind-induced precipitation measurement errors, *Hydrol. Earth Syst. Sci.*, 21, 1973–1989, <https://doi.org/10.5194/hess-21-1973-2017>, 2017.

Pierre, A., S. Jutras, C. Smith, J. Kochendorfer, V. Fortin, and F. Anctil, 2019: Evaluation of Catch Efficiency Transfer Functions for Unshielded and Single-Alter-Shielded Solid Precipitation Measurements. *J. Atmos. Oceanic Technol.*, 36, 865–881, <https://doi.org/10.1175/JTECH-D-18-0112.1>.

Smith, C. D., Ross, A., Kochendorfer, J., Earle, M. E., Wolff, M., Buisán, S., Roulet, Y.-A., and Laine, T.: Evaluation of the WMO Solid Precipitation Intercomparison Experiment (SPICE) transfer functions for adjusting the wind bias in solid precipitation measurements, *Hydrol. Earth Syst. Sci.*, 24, 4025–4043, <https://doi.org/10.5194/hess-24-4025-2020>, 2020.
